# Supplementary material for: PDK1 Inhibitor BX795 Improves Cisplatin and Radio-Efficacy in Oral Squamous Cell Carcinoma by Downregulating the PDK1/CD47/Akt-Mediated Glycolysis Signaling Pathway
Source: MDPI journal article supplement (doi:10.3390/ijms222111492), 2021-10-25
Supplement: s1 [file s1]

## **SUPPLEMENTARY INFORMATION**

### **PDK1 inhibitor BX795 improves cisplatin and radio-efficacy in oral squamous cell carcinoma by downregulating the PDK1/CD47/Akt-mediated glycolysis signalling pathway**

Shin Pai, MD<sup>1,2</sup>, Vijesh Kumar Yadav, PhD<sup>3,4</sup>, Kuang-Tai Kuo, MD., PhD<sup>5,6</sup>, Narpati Wesa Pikatan, PhD<sup>3,4</sup>, Chun-Shu Lin, MD., PhD<sup>7</sup>, Ming-Hsien Chien, PhD<sup>1</sup>, Wei-Hwa Lee, MD., PhD<sup>3,8</sup>, Michael Hsiao, PhD<sup>9</sup>, Shao-Chih Chiu<sup>10,11,12</sup>, Chi-Tai Yeh, PhD<sup>1,3,4\*</sup> and Jo-Ting Tsai, MD., PhD<sup>1,13,14\*</sup>

#### **Authors' affiliation:**

1 Graduate Institute of Clinical Medicine, College of Medicine, Taipei Medical University, Taipei 110, Taiwan.

2 Department of Oral & Maxillofacial Surgery, Saint Martin de Parres Hospital, Chiayi City 60069, Taiwan;

3 Department of Medical Research and Education, Taipei Medical University - Shuang Ho Hospital, New Taipei City 23561, Taiwan.

4 Department of Medical Laboratory Science and Biotechnology, Yuanpei University of Medical Technology, Hsinchu City 30015, Taiwan.

5 Division of Thoracic Surgery, Department of Surgery, School of Medicine, College of Medicine, Taipei Medical University, Taipei 110, Taiwan

6 Division of Thoracic Surgery, Department of Surgery, Shuang Ho Hospital, Taipei Medical University, New Taipei City 23561, Taiwan

7 Department of Radiation Oncology, Tri-Service General Hospital, National Defense Medical Center, Taipei, Taiwan;

8 Department of Pathology, Taipei Medical University - Shuang Ho Hospital, New Taipei City 23561, Taiwan.

9 Genomics Research Center, Academia Sinica, Taipei, Taiwan;

10 Graduate Institute of Biomedical Sciences, China Medical University, Taichung 40447, Taiwan.

11 Translational Cell Therapy Center, Department of Medical Research, China Medical University Hospital, Taichung 404, Taiwan

12 Drug Development Center, China Medical University, Taichung 40447, Taiwan

13 Department of Radiology, School of Medicine, College of Medicine, Taipei Medical University, Taipei, Taiwan;

14 Department of Radiology, Taipei Medical University - Shuang Ho Hospital, New Taipei City, Taiwan.

\* Correspondence: author(s):

\* Correspondence: Prof. Chi-Tai Yeh, PhD., Department of Medical Research and Education, Taipei Medical University - Shuang Ho Hospital, New Taipei City 23561, Taiwan; Tel: +886-2-2490088 ext. 8881, Fax: +886-2-2248-0900, E-mail: [ctyeh@s.tmu.edu.tw](mailto:ctyeh@s.tmu.edu.tw)

\* Correspondence: Prof. Jo-Ting Tsai, MD., PhD., Department of Radiation Oncology, Cancer Center, Taipei Medical University - Shuang Ho Hospital, New Taipei City 23561, Taiwan; Tel: +886-2-2490088 ext. 8885, Fax: +886-2-2248-0900, E-mail: [10576@s.tmu.edu.tw](mailto:10576@s.tmu.edu.tw)

**Working title: PDK1 /CD47/Akt-mediated glycolysis signalling in OSCC**

**Supplementary Table S1.** Western blot antibodies sheet.

| No. | Target            | Dilution | Catalog                                                     | kDa       |
|-----|-------------------|----------|-------------------------------------------------------------|-----------|
| 1   | GAPDH             | 1:1000   | GAPDH (0411K) Mouse mAb SC-27724                            | 37        |
| 2   | CD47              | 1:500    | CD47 (B6H12) Mouse mAb SC-12730                             | 47        |
| 3   | p-PI3K            | 1:1000   | Phospho-PI3 Kinase p85 (Tyr458)/p55 (Tyr199) Antibody #4228 | 60 and 85 |
| 4   | PI3K              | 1:1000   | PI3 Kinase p110 $\alpha$ (C73F8) Rabbit mAb #4249           | 110       |
| 5   | p-PDK1            | 1:1000   | Phospho-PDK1 (Ser241) Antibody #3061                        | 58 - 68   |
| 6   | PDK1              | 1:1000   | PDK1 (D37A7) Rabbit mAb #5662                               | 58 - 68   |
| 7   | p-AKT             | 1:1000   | Phospho-Akt (Ser473) (D9E) XP® Rabbit mAb #4060             | 60        |
| 8   | AKT               | 1:1000   | Akt Rabbit Polyclonal antibody #9272                        | 60        |
| 9   | p-mTOR            | 1:1000   | Phospho-mTOR (Ser2481) Antibody #2974                       | 289       |
| 10  | mTOR              | 1:1000   | mTOR (7C10) Rabbit mAb #2983                                | 289       |
| 11  | Sox2              | 1:1000   | Sox2 (L1D6A2) Mouse mAb #4900                               | 35        |
| 12  | Oct-4             | 1:1000   | Oct-4 (C30A3) Rabbit mAb #2840                              | 45        |
| 13  | CD133             | 1:1000   | CD133 Rabbit mAb 18470-1-AP                                 | 120       |
| 14  | LDHA              | 1:1000   | LDHA (C4B5) Rabbit mAb #3582                                | 37        |
| 15  | Bak               | 1:1000   | Bak (D2D3) Rabbit mAb #6947                                 | 25        |
| 16  | Bax               | 1:1000   | Bax (D2E11) Rabbit mAb #5023                                | 20        |
| 17  | Bcl-2             | 1:1000   | Bcl-2 (50E3) Rabbit mAb #2870                               | 26        |
| 18  | E-Cadherin        | 1:1000   | E-Cadherin (24E10) Rabbit mAb #3195                         | 125-135   |
| 19  | N-cadherin        | 1:1000   | N-Cadherin Rabbit polyclonal Antibody #4061                 | 140       |
| 20  | Vimentin          | 1:1000   | Anti-Vimentin antibody (ab137321)                           | 57        |
| 21  | Slug              | 1:1000   | Slug (C19G7) Rabbit mAb #9585                               | 30        |
| 22  | Snail             | 1:1000   | Snail Rabbit mAb #3879P                                     | 29        |
| 23  | $\gamma$ -H2AX    | 1:1000   | Gamma-H2AX Recombinant Rabbit Monoclonal Antibody (BLR053F) | 15        |
| 24  | H2AX              | 1:1000   | Histone H2A.X (D17A3) XP® Rabbit mAb #7631                  | 15        |
| 25  | Cleaved Caspase-3 | 1:1000   | Cleaved Caspase-3 (Asp175) Antibody #9661                   | 17.19     |
| 26  | Cleaved Caspase-9 | 1:1000   | Cleaved Caspase-9 (Asp315) Antibody (Human Specific) #9505  | 35        |
| 27  | $\beta$ -Catenin  | 1:1000   | $\beta$ -Catenin (6B3) Rabbit mAb #9582                     | 92        |
| 28  | PFKP              | 1:1000   | PFKP (D2E5) Rabbit mAb #12746                               | 80        |
| 29  | PDK3              | 1:1000   | PDK3 Polyclonal antibody (12215-1-AP)                       | 47        |



**Supplementary Figure S1. Identification of differentially expressed genes (DEGs) in gene expression omnibus (GEO) datasets.** (A) Volcano plot of DEGs in GSE30784., Red, blue and gray color represent the relatively high, low and equal expression of genes in the corresponding group, respectively.  $p < .05$  and  $|\log(\text{FC})| > 1$  were set as the threshold. (B-D) Gene Ontology (GO) and Gene Set Enrichment Analysis (GSEA) of OSCC tumor samples with the normal sample. (E) STRING database analysis of the relationship between PDK1, Akt, CD47, LDHA genes. Network nodes represent proteins encoded by genes. \*  $p < 0.05$ , \*\*  $p < 0.01$ , \*\*\*  $p < 0.001$ .



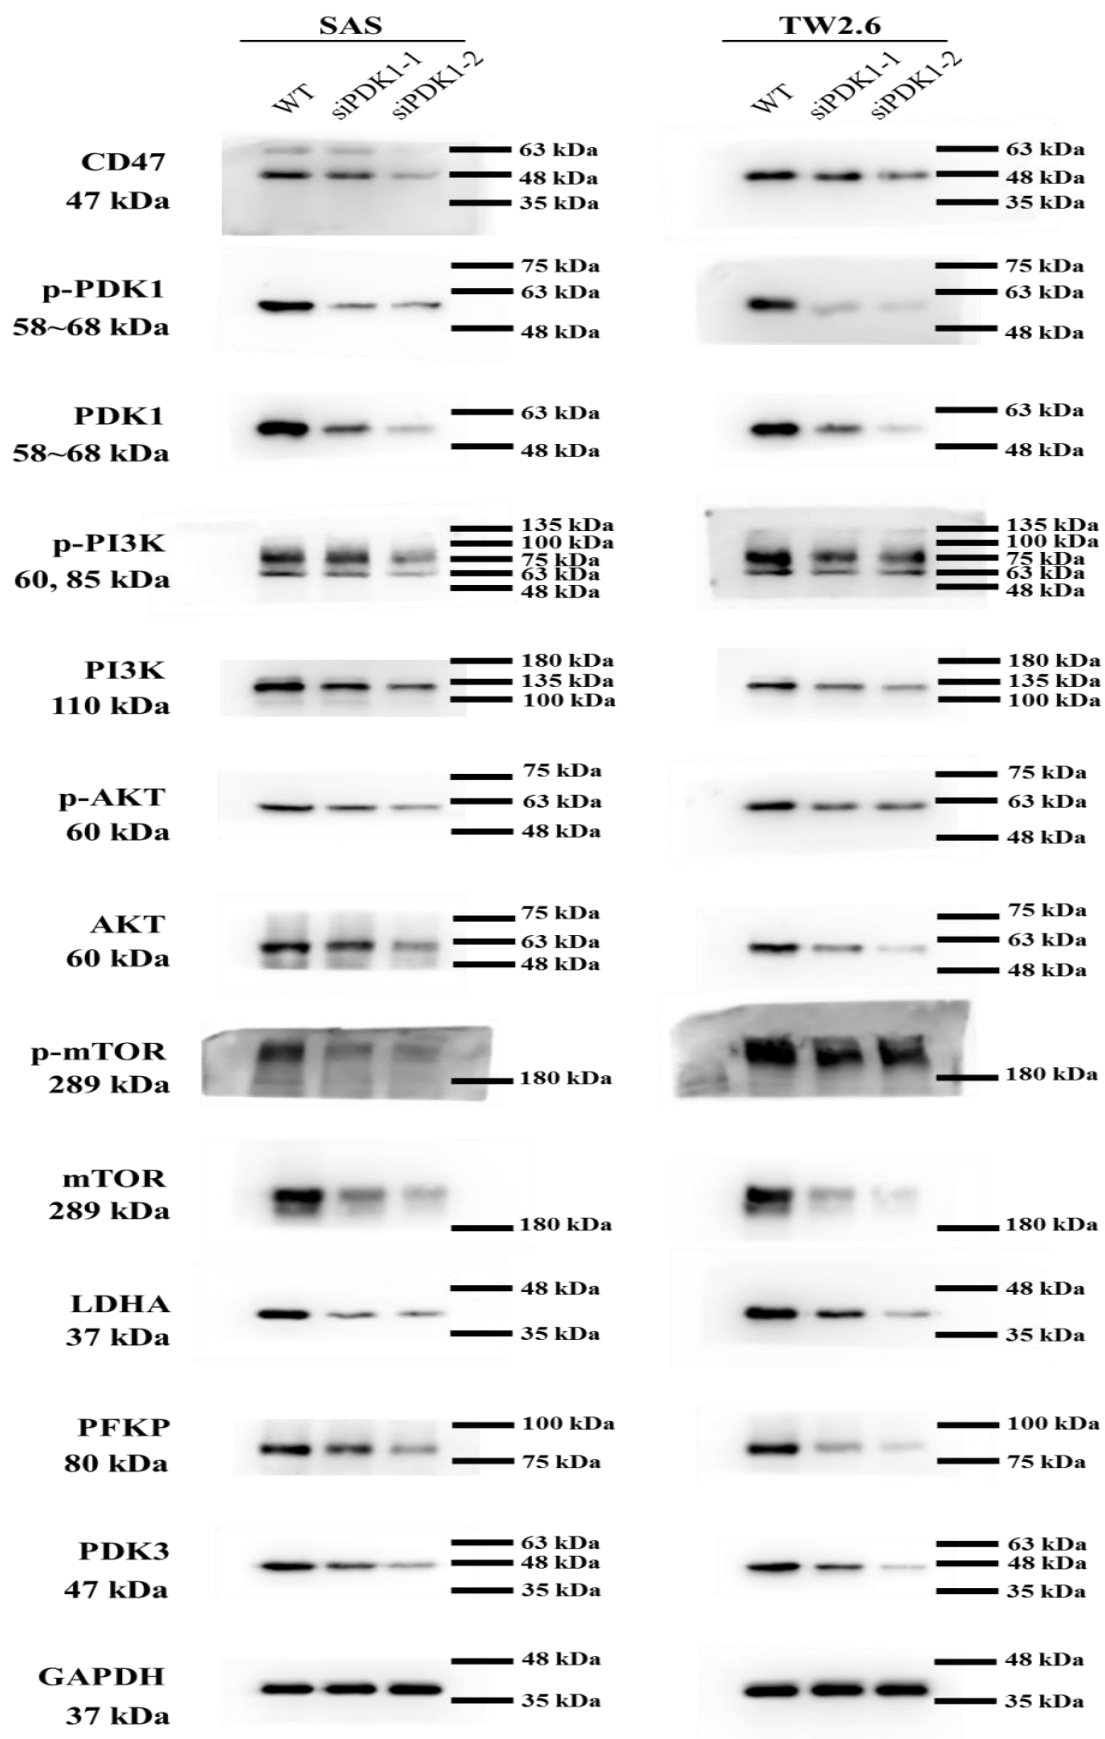

Supplementary Figure S2. Full-size blots of Figure 2D

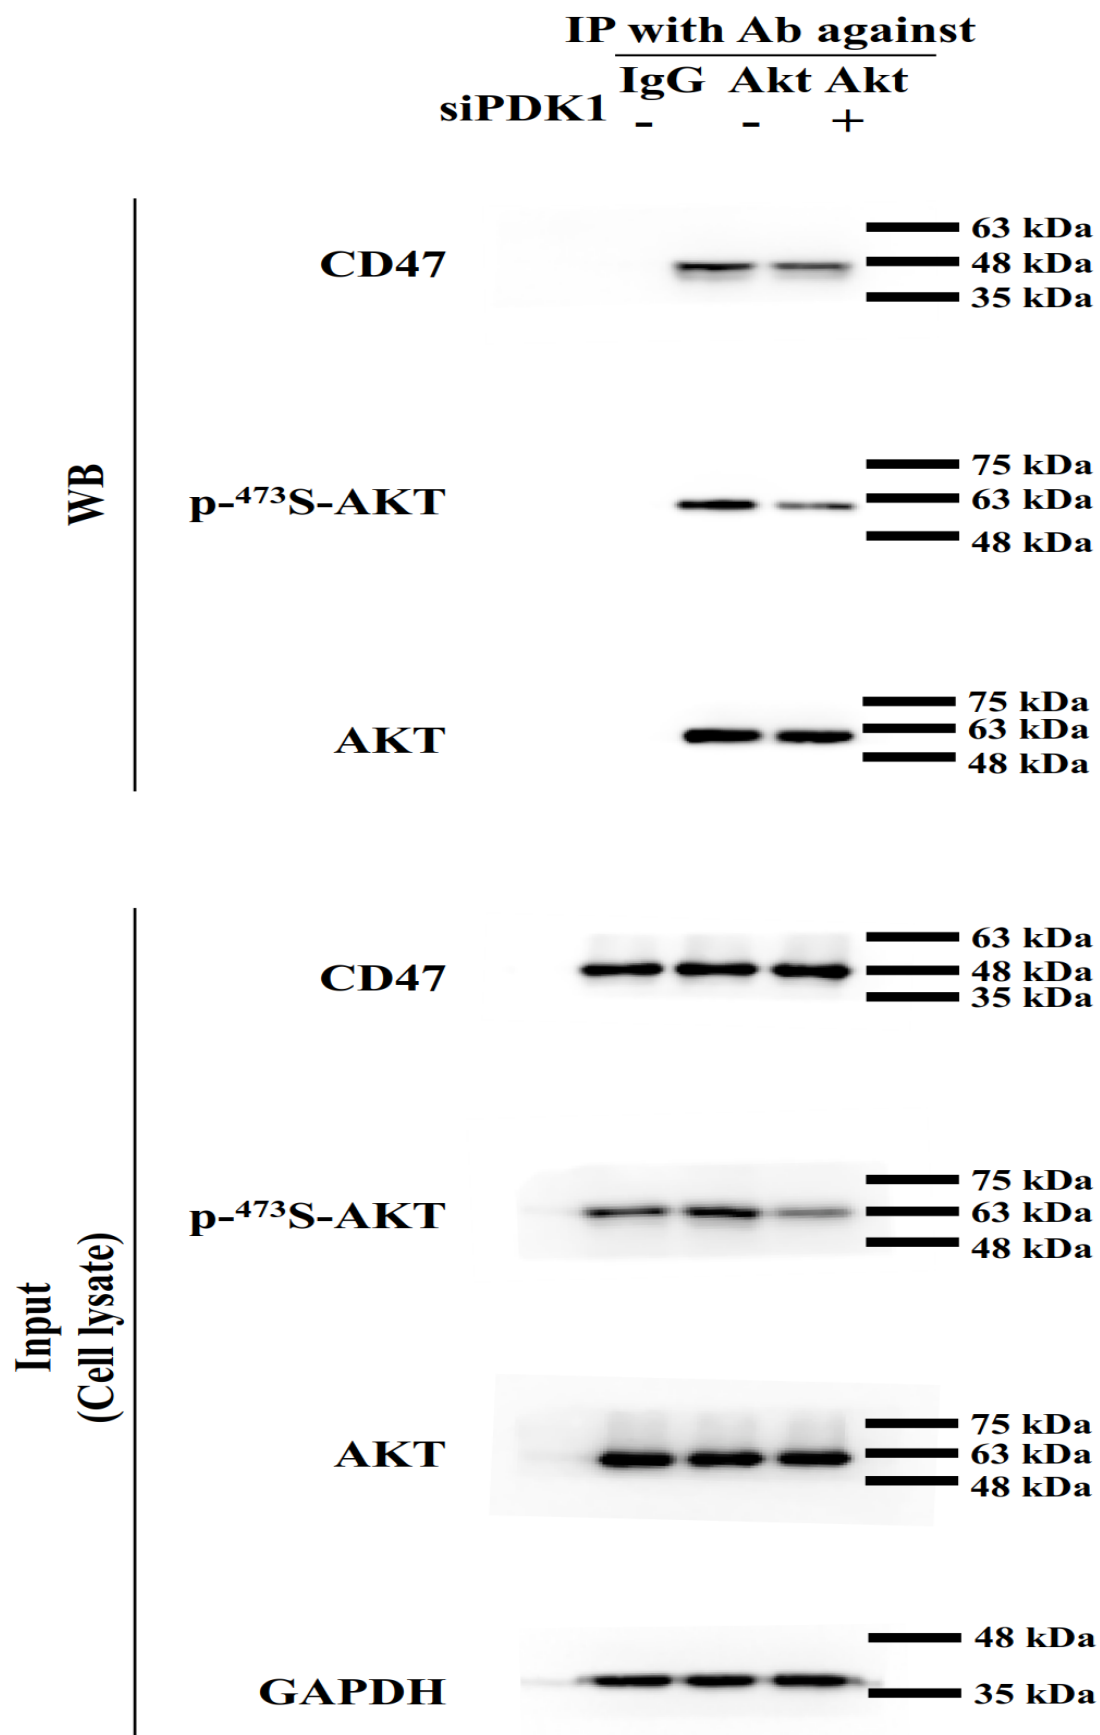

Supplementary Figure S3. Full-size blots of Figure 2E

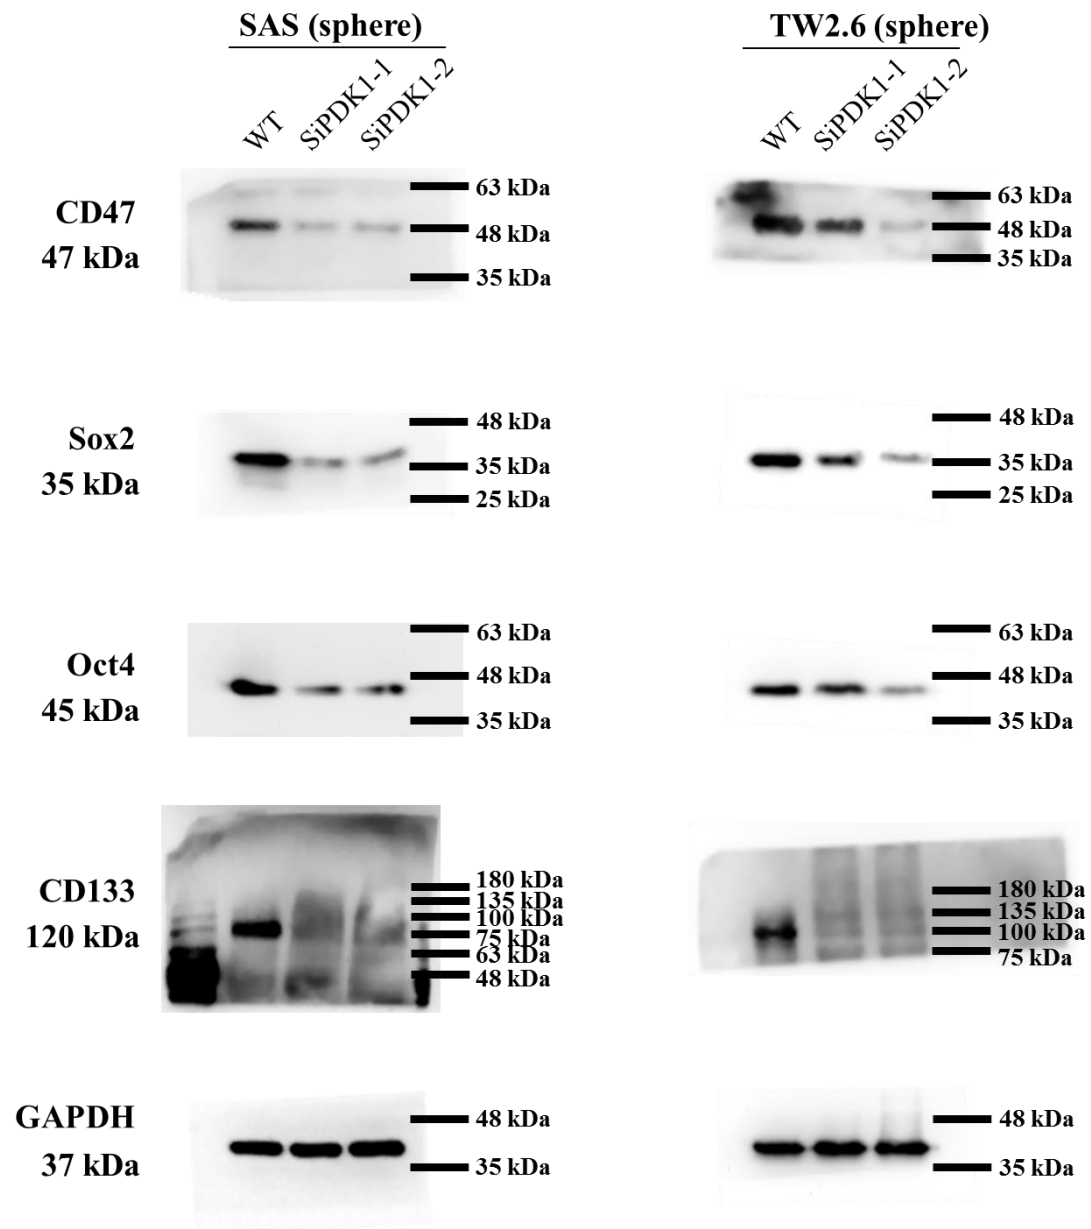

**Supplementary Figure S4.** Full-size blots of Figure 3D



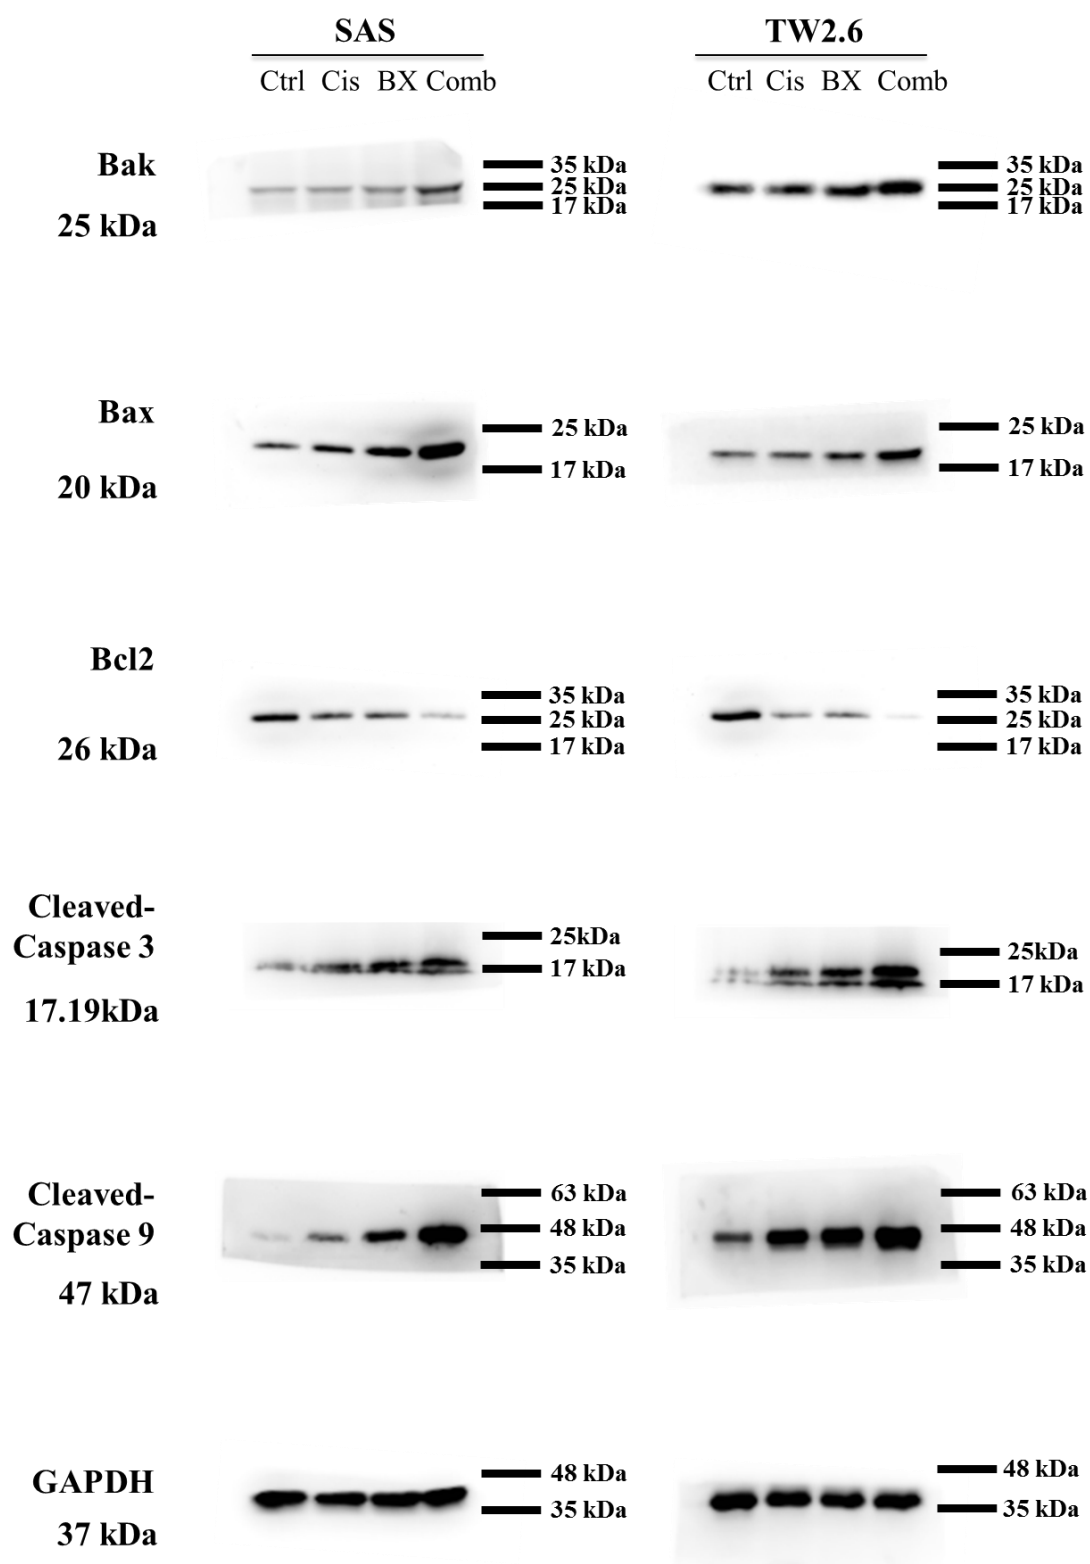

**Supplementary Figure S5.** Full-size blots of Figure 4D

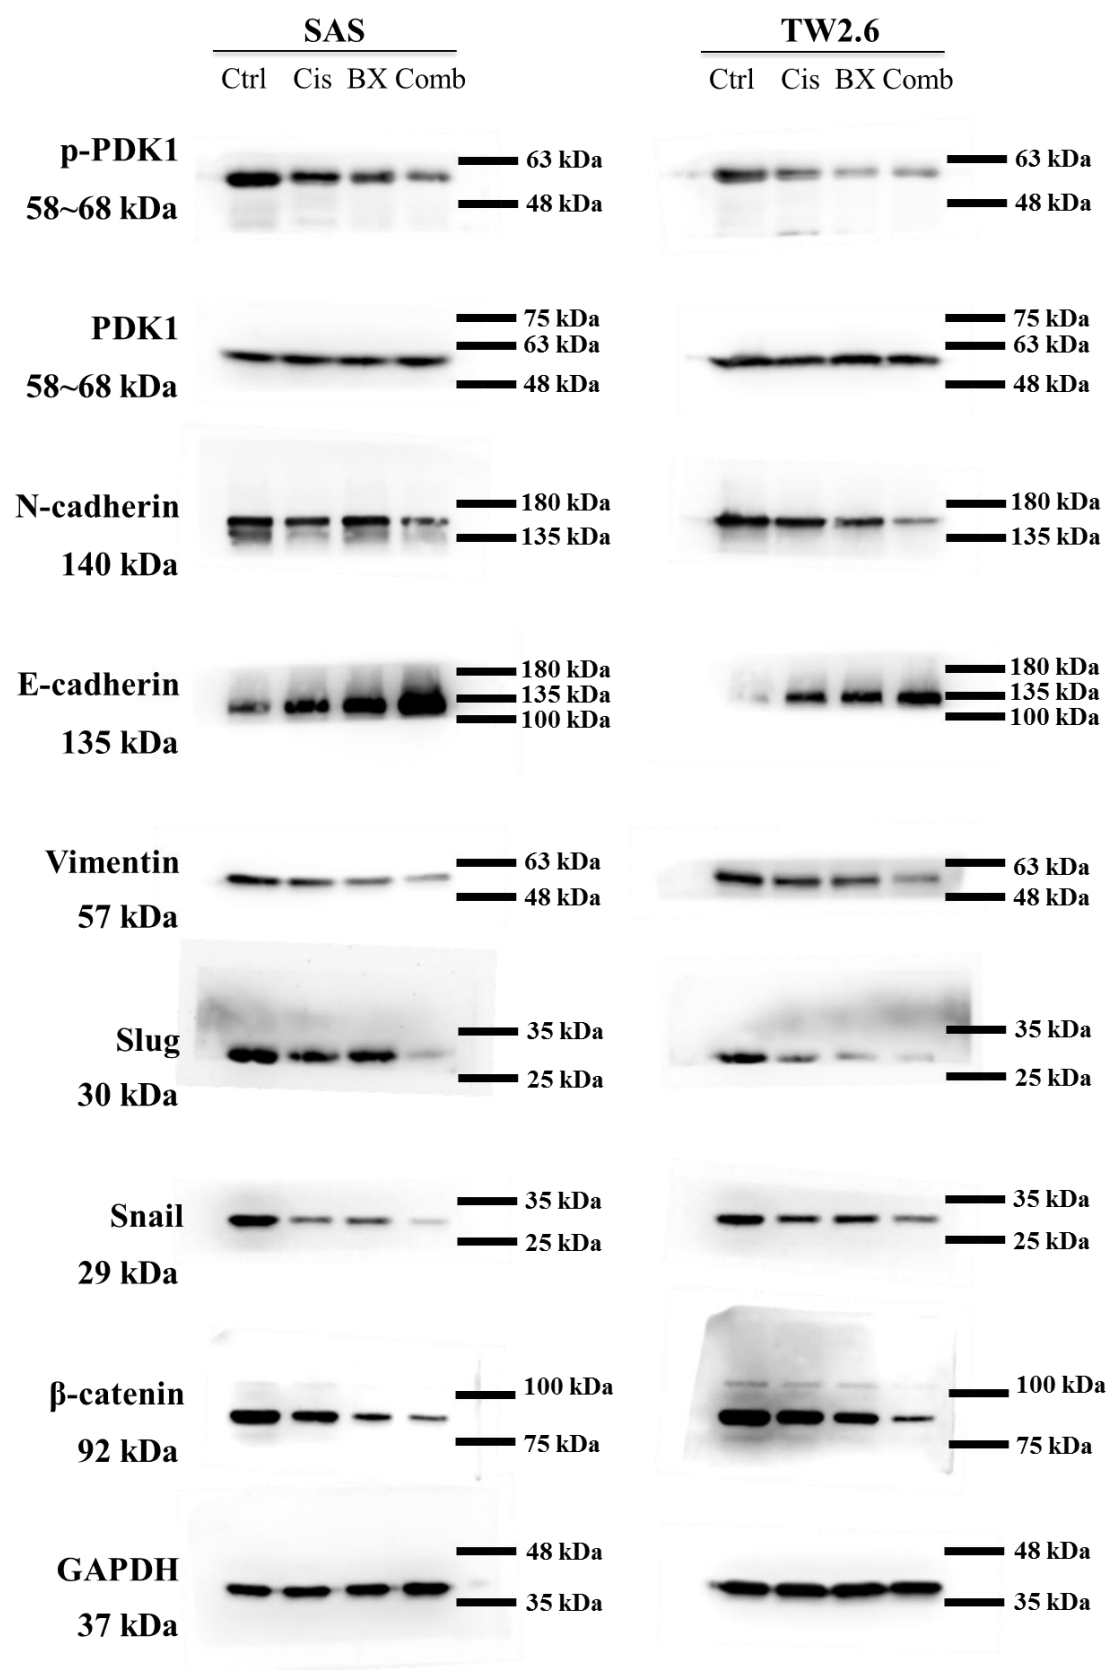

**Supplementary Figure S6.** Full-size blots of Figure 5D

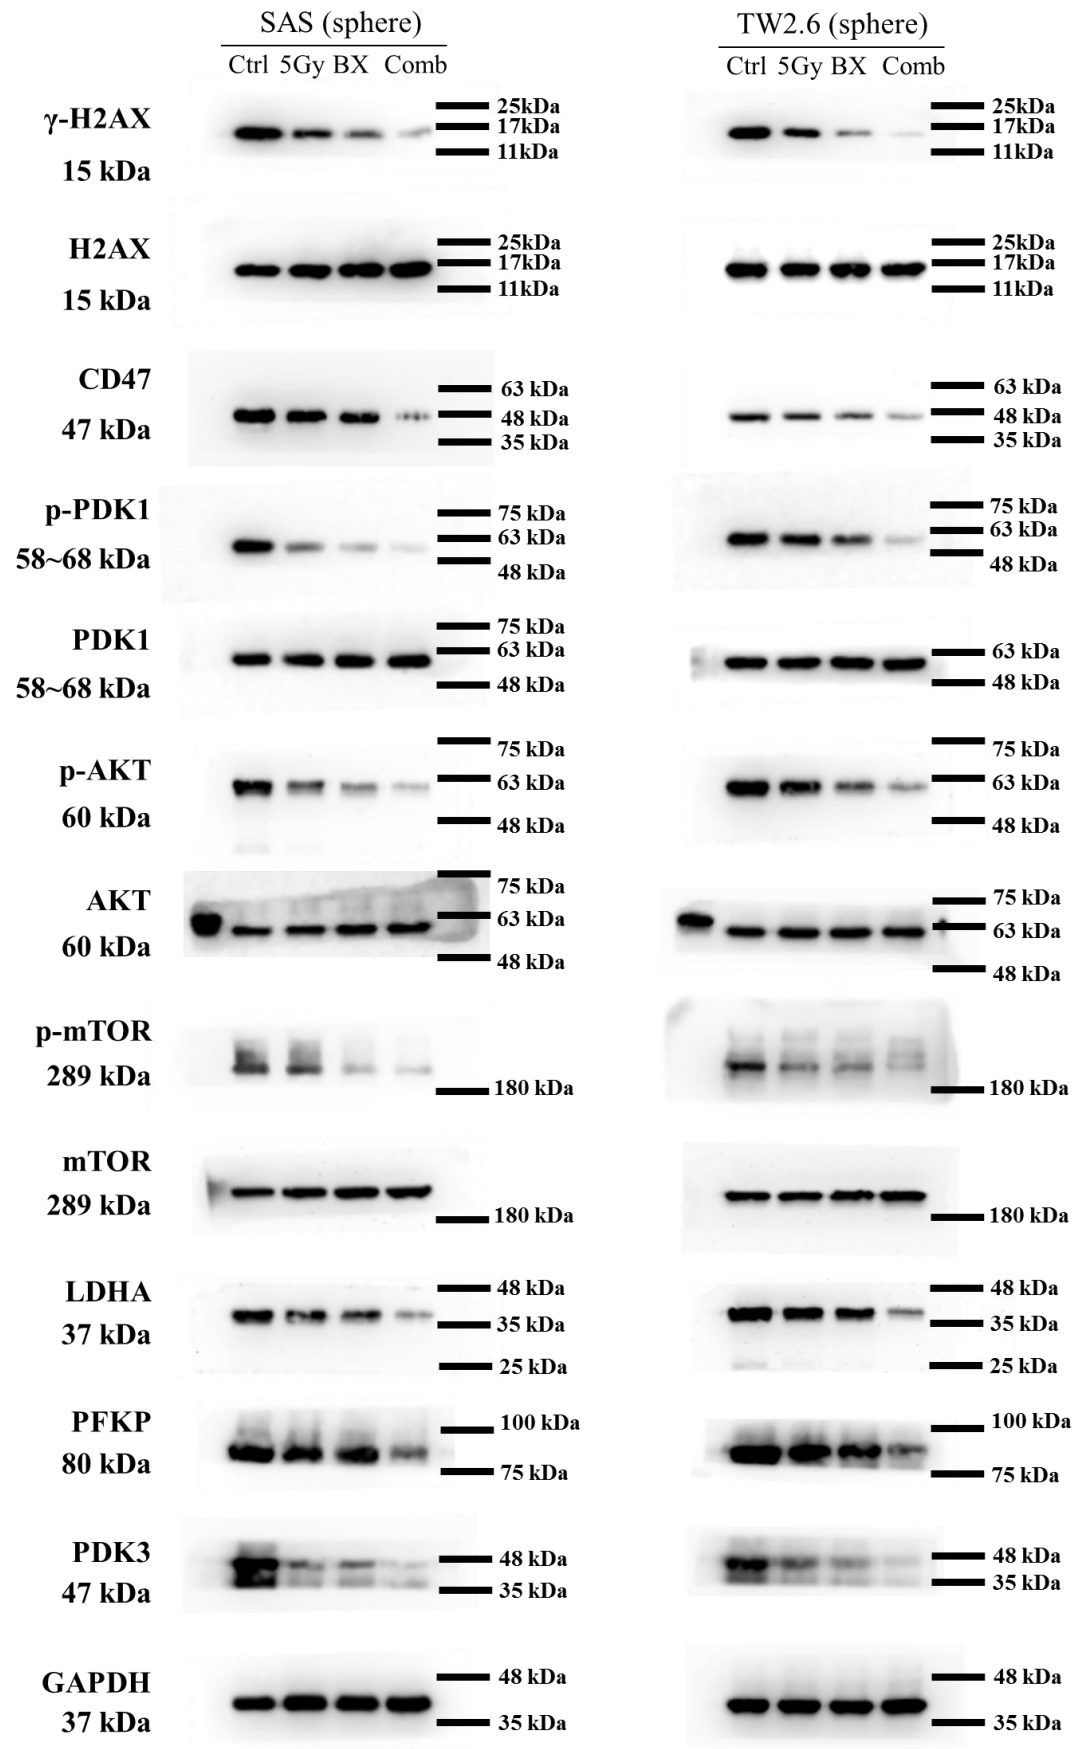

**Supplementary Figure S7.** Full-size blots of Figure 6F
